# Supplementary material for: Ambient pressure XPS and IRRAS investigation of ethanol steam reforming on Ni–CeO2(111) catalysts: an in situ study of C–C and O–H bond scission
Source: Royal Society of Chemistry journal article supplement (doi:10.1039/c6cp01212d), 2016-01-01
Supplement: c6cp01212d1.pdf [file c6cp01212d1.pdf]

## Supporting Information

### **Ambient Pressure XPS and IRRAS Investigation of Ethanol Steam Reforming on Ni-CeO<sub>2</sub>(111) Catalysts: An In Situ Study of C-C and O-H Bond Scission**

Zongyuan Liu <sup>a,b</sup>, Tomáš Duchoň <sup>c</sup>, Huanru Wang <sup>a</sup>, David C. Grinter <sup>a</sup>, Iradwikanari Waluyo <sup>a</sup>, Jing Zhou <sup>d</sup>, Qiang Liu <sup>e</sup>, Beomgyun Jeong <sup>e</sup>, Ethan J. Crumlin <sup>e</sup>, Vladimír Matolín <sup>c</sup>, Dario J. Stacchiola <sup>a</sup>, José A. Rodríguez <sup>a,b</sup>, Sanjaya D. Senanayake <sup>a,\*</sup>

---

<sup>a</sup> Chemistry Department, Brookhaven National Laboratory, Upton, New York 11973 Email: [ssenanay@bnl.gov](mailto:ssenanay@bnl.gov)

<sup>b</sup> Department of Chemistry, Stony Brook University, Stony Brook, NY, 11794

<sup>c</sup> Faculty of Mathematics and Physics, Charles University in Prague, V Holešovičkách 2, Praha 8, Czech Republic

<sup>d</sup> Department of Chemistry, University of Wyoming, Laramie, WY 82071

<sup>e</sup> Advanced Light Source, Lawrence Berkeley National Laboratory, Berkeley, CA 94720

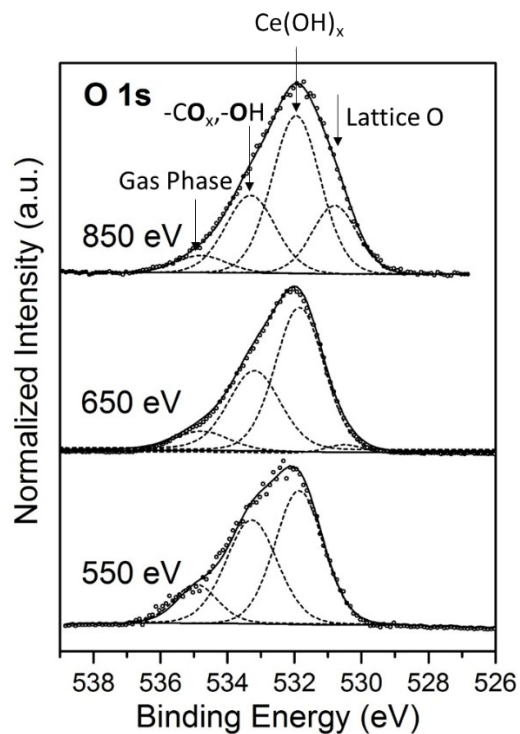

Figure S1. O 1s spectra after the ethanol steam reforming reaction on Ni-CeO<sub>2</sub>(111) surface with different incident photon energy as indicated.

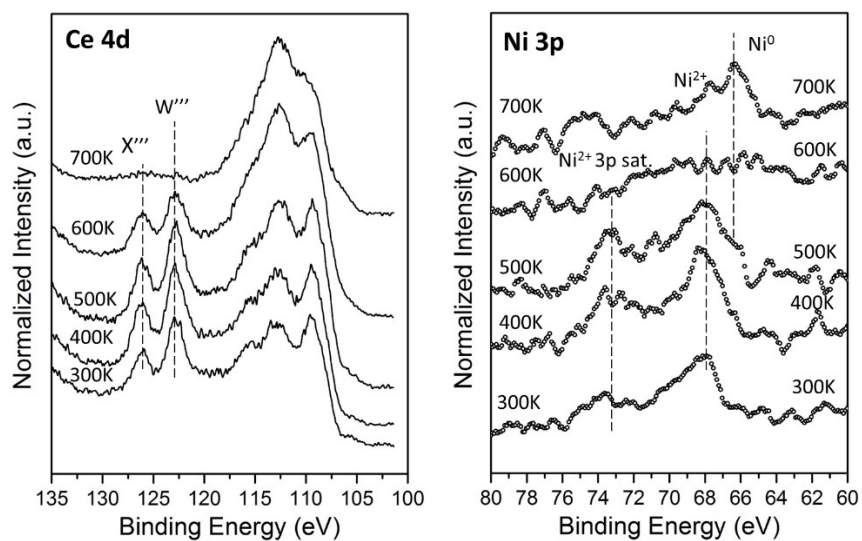

Figure S2. Ce 4d and Ni 3p spectra for the Ni-CeO<sub>2</sub>(111) surface under the reaction with 40 mTorr ethanol
